1 TITLE: Transcriptional mediators of treatment resistance in lethal prostate cancer

2

3 AUTHORS:

|                       |                                                                                              |          |
|-----------------------|----------------------------------------------------------------------------------------------|----------|
| Meng Xiao He          | <a href="mailto:mxhe@g.harvard.edu">mxhe@g.harvard.edu</a>                                   | 1, 2, 3  |
| Michael S. Cuoco      | <a href="mailto:mcuoco@broadinstitute.org">mcuoco@broadinstitute.org</a>                     | 3        |
| Jett Crowdis          | <a href="mailto:jcrowdis@broadinstitute.org">jcrowdis@broadinstitute.org</a>                 | 2, 3     |
| Alice Bosma-Moody     | <a href="mailto:abosmamo@broadinstitute.org">abosmamo@broadinstitute.org</a>                 | 2, 3, 4  |
| Zhenwei Zhang         | <a href="mailto:zhenwei_zhang@dfci.harvard.edu">zhenwei_zhang@dfci.harvard.edu</a>           | 2        |
| Kevin Bi              | <a href="mailto:kevinbi@broadinstitute.org">kevinbi@broadinstitute.org</a>                   | 2, 3     |
| Abhay Kanodia         | <a href="mailto:Abhay.Kanodia@stonybrook.edu">Abhay.Kanodia@stonybrook.edu</a>               | 2        |
| Mei-Ju Su             | <a href="mailto:windslove52039@gmail.com">windslove52039@gmail.com</a>                       | 2        |
| Christopher Rodman    | <a href="mailto:crodman5447@gmail.com">crodman5447@gmail.com</a>                             | 3        |
| Laura DelloStritto    | <a href="mailto:laura_Dellostritto@dfci.harvard.edu">laura_Dellostritto@dfci.harvard.edu</a> | 2, 9     |
| Parin Shah            | <a href="mailto:parin1308@gmail.com">parin1308@gmail.com</a>                                 | 2        |
| Kelly P. Burke        | <a href="mailto:kelly_Burke@dfci.harvard.edu">kelly_Burke@dfci.harvard.edu</a>               | 2, 5, 6  |
| Benjamin Izar         | <a href="mailto:Bi2175@cumc.columbia.edu">Bi2175@cumc.columbia.edu</a>                       | 7, 8     |
| Ziad Bakouny          | <a href="mailto:ziad_elbakouny@dfci.harvard.edu">ziad_elbakouny@dfci.harvard.edu</a>         | 2        |
| Alok K. Tewari        | <a href="mailto:alok_tewari@dfci.harvard.edu">alok_tewari@dfci.harvard.edu</a>               | 2        |
| David Liu             | <a href="mailto:davidliu@broadinstitute.org">davidliu@broadinstitute.org</a>                 | 2, 3     |
| Sabrina Y. Camp       | <a href="mailto:scamp@broadinstitute.org">scamp@broadinstitute.org</a>                       | 2, 3     |
| Natalie I. Vokes      | <a href="mailto:nvokes@broadinstitute.org">nvokes@broadinstitute.org</a>                     | 2, 3     |
| Jihye Park            | <a href="mailto:jpark@broadinstitute.org">jpark@broadinstitute.org</a>                       | 2, 3     |
| Sébastien Vigneau     | <a href="mailto:Sebastien_Vigneau@dfci.harvard.edu">Sebastien_Vigneau@dfci.harvard.edu</a>   | 2, 3, 11 |
| Lawrence Fong         | <a href="mailto:Lawrence.Fong@ucsf.edu">Lawrence.Fong@ucsf.edu</a>                           | 9        |
| Orit Rozenblatt-Rosen | <a href="mailto:orit@broadinstitute.org">orit@broadinstitute.org</a>                         | 3        |
| Aviv Regev            | <a href="mailto:aregev@broadinstitute.org">aregev@broadinstitute.org</a>                     | 3, 10    |
| Asaf Rotem            | <a href="mailto:Asaf_Rotem@dfci.harvard.edu">Asaf_Rotem@dfci.harvard.edu</a>                 | 2, 3, 11 |
| Mary-Ellen Taplin*    | <a href="mailto:Mary_Taplin@dfci.harvard.edu">Mary_Taplin@dfci.harvard.edu</a>               | 2        |
| Eliezer M. Van Allen* | <a href="mailto:EliezerM_VanAllen@dfci.harvard.edu">EliezerM_VanAllen@dfci.harvard.edu</a>   | 2, 3, 11 |

4 \*co-senior authors

5 AFFILIATIONS:

- 6 1. Harvard Graduate Program in Biophysics, Boston, MA
- 7 2. Department of Medical Oncology, Dana-Farber Cancer Institute, Boston, MA
- 8 3. Broad Institute of Harvard and MIT, Cambridge, MA
- 9 4. Harvard Medical School, Boston, MA
- 10 5. Department of Immunology, Blavatnik Institute, Harvard Medical School
- 11 6. Evergrande Center for Immunologic Diseases, Harvard Medical School and Brigham and
- 12 Women's Hospital, Boston, MA
- 13 7. Columbia Center for Translational Immunology, New York, NY
- 14 8. Columbia University Medical Center, Department of Medicine, Division of
- 15 Hematology/Oncology, New York, NY
- 16 9. Division of Hematology and Oncology, University of California, San Francisco, San
- 17 Francisco, CA
- 18 10. Howard Hughes Medical Institute and Koch Institute for Integrative Cancer Research,
- 19 Department of Biology, MIT, Cambridge, MA
- 20 11. Center for Cancer Genomics, Dana-Farber Cancer Institute, Boston, MA

21

22 CORRESPONDENCE:

23 Eliezer M. Van Allen  
24 Dana-Farber Cancer Institute  
25 450 Brookline Ave  
26 Boston, MA 02215  
27 Eliezerm\_vanallen@dfci.harvard.edu

28 ABSTRACT (201 words)

29 Metastatic castration resistant prostate cancer (mCRPC) is primarily treated with  
30 therapies that prevent transcriptional activity of the androgen receptor (AR), cause DNA damage,  
31 or prevent cell division. Clinical resistance to these therapies, including second-generation  
32 androgen-targeting compounds such as enzalutamide and abiraterone, is nearly universal. Other  
33 treatment modalities, including immune checkpoint inhibitors, have provided minimal benefit  
34 except in rare subsets of patients<sup>1,2</sup>. Both tumour intrinsic and extrinsic cellular programs  
35 contributing to therapeutic resistance remain areas of active investigation. Here we use full-  
36 length single-cell RNA-sequencing (scRNA-seq) to identify the transcriptional states of cancer  
37 and immune cells in the mCRPC microenvironment. Within cancer cells, we identified  
38 transcriptional patterns that mediate a significant proportion of inherited risk for prostate cancer,  
39 extensive heterogeneity in *AR* splicing within and between tumours, and vastly divergent  
40 regulatory programs between adenocarcinoma and small cell carcinoma. Moreover, upregulation  
41 of TGF- $\beta$  signalling and epithelial-mesenchymal transition (EMT) were both associated with  
42 resistance to enzalutamide. We found that some lymph node metastases, but no bone metastases,  
43 were heavily infiltrated by dysfunctional CD8<sup>+</sup> T cells, including cells undergoing dramatic  
44 clonal expansion during enzalutamide treatment. Our findings suggest avenues for rational  
45 therapeutic approaches targeting both tumour-intrinsic and immunological pathways to combat  
46 resistance to current treatment options.

47 MAIN (2,745 words)

48 Despite advances in targeting androgen receptor signalling and other drivers, mCRPC is  
49 typically lethal<sup>2</sup>. The identities and proportions of cells within human mCRPC niches is largely  
50 unknown. By defining treatment resistant states in human mCRPC, we may reveal biological

51 drivers that inform new treatment strategies. Thus, we collected fresh biopsies from mCRPC  
52 patients from representative metastatic sites for whole exome sequencing, bulk RNA-seq, and  
53 scRNA-seq using the Smart-seq2 protocol, which generates full-length transcript sequences<sup>3</sup>. At  
54 time of biopsy, patients had experienced varied treatment histories, with approximately even  
55 representation before and after treatment with enzalutamide. Smaller proportions of patients had  
56 experienced abiraterone, taxanes, and other therapies (Fig. 1a). In addition to adenocarcinomas,  
57 one biopsied tumour (09171135) had a small cell carcinoma histology.

58         After quality control, our cohort consisted of 2,170 deeply sequenced cells from 14  
59 patients and 15 biopsies, including cells from both before and after enzalutamide treatment for  
60 one patient (01115655) (Methods; Supplementary Fig. 1a). Following clustering of the single-  
61 cell transcriptomes, we manually labelled cell clusters for dominant cell type based on cluster-  
62 specific expression of marker genes (Fig. 1b; Methods; Supplementary Table 2). Cancer cells,  
63 represented in multiple clusters marked by expression of the adenocarcinoma markers *AR* and  
64 *KLK3* (which encodes prostate-specific antigen) or the neuroendocrine marker *CHGA*, were  
65 recovered from 12 biopsies, comprising over a third of the cells (n=836). The remainder included  
66 cells from the B cell lineage, natural killer (NK) and T cells, monocytes and macrophages,  
67 erythroid cells, and neutrophils.

68         Prostate cancer is highly heritable, with an estimated 57% of variation in risk attributed to  
69 inherited variants<sup>4</sup>. Genome wide association studies (GWAS) have not only identified  
70 significant risk alleles but also generated results that allow the analysis of even non-significantly  
71 associated variants in aggregate to link risk to subsets of the genome. We sought to identify cell  
72 types relevant to prostate cancer development by integrating cell-type specific expression  
73 patterns from our scRNA-seq data with results from a recent large-scale GWAS of prostate

74 cancer risk<sup>5</sup>. Using LD score regression applied to specifically expressed genes (LDSC-SEG),  
75 we identified significant enrichment of germline heritability for prostate cancer in genomic  
76 intervals near genes that were specifically expressed in cancer cells ( $q = 0.031$ , Benjamini-  
77 Hochberg) (Fig. 1c; Methods)<sup>6</sup>. No significant enrichment was observed for any other cell type,  
78 indicating that when assessed during advanced disease, inherited risk for prostate cancer is  
79 primarily mediated through tumour-intrinsic mechanisms.

### 80 *Complex androgen receptor splicing*

81 We therefore assessed transcriptional programs in cancer cells across metastatic niches  
82 and clinical contexts. As prostate adenocarcinomas are dependent on androgen signalling for  
83 survival, significant attention has been focused on the description and detection of a diverse set  
84 of *AR* splice variants. The AR protein contains a DNA-binding domain with transcriptional  
85 regulatory activity and a ligand-binding domain required for control of its activity by androgens.  
86 Splice variants that omit the ligand-binding domain, particularly AR-V7, have been hypothesized  
87 to constitutively activate downstream transcriptional programs independent of androgen binding,  
88 providing a resistance mechanism to second generation androgen-targeting therapies<sup>7,8</sup>. Taking  
89 advantage of our dataset's even sequencing coverage along transcripts, we detected the presence  
90 of specific *AR* splice variants. First, we curated a transcriptome annotation of literature described  
91 isoforms (Methods). Then, we remapped all reads from individual cancer cells initially mapping  
92 to the *AR* locus, counting the number of reads that uniquely map to individual isoforms (Fig. 2a;  
93 Methods). We detected isoform-informative reads indicating the presence of many previously  
94 described splice variants within our clinical biopsies, with AR-45, AR-V7, and AR-V12 being  
95 uniquely identified in the most cells. AR-45 was detected in every biopsy with any isoform-  
96 specific reads. AR-V7 was present in biopsies from both before and after enzalutamide exposure.

97 Strikingly, we detected multiple *AR* splice variants within the same biopsy and even within the  
98 same cell, highlighting the complexity of *AR* splicing in mCRPC.

99 Isoform-informative reads comprise only a small fraction of reads mapping to any gene,  
100 and *AR* splice variants described in literature may not represent a complete census of all isoforms  
101 expressed *in vivo* (Supplementary Fig. 2). Therefore, we defined two alternative summary  
102 measures of *AR* splicing that permitted characterization within more of the individual cancer  
103 cells. *AR* intron 3 contains many of the terminal cryptic/alternative exons included in truncated  
104 *AR* isoforms lacking the ligand-binding domain, including AR-V7<sup>7</sup>. We quantified the proportion  
105 of total *AR* coverage that lies in intron 3 or in a larger interval that includes intron 3 and upstream  
106 exons, which encode the DNA-binding domain (Fig. 2b). Again, we detected significant  
107 variation between cancer cells within the same biopsy. Moreover, we detected a clear increase in  
108 both measures after enzalutamide treatment for patient 01115655, suggesting decreased  
109 transcription of full-length *AR* compared to truncating variants after treatment (Fig. 2c,d).  
110 Overall, *AR* splicing patterns in mCRPC cells were highly heterogeneous between and within  
111 tumours regardless of treatment resistance state.

### 112 *Enzalutamide resistance programs*

113 Resistance to second generation androgen-targeting therapies poses a major clinical  
114 challenge, and previous work based on bulk whole exome and transcriptome sequencing have  
115 identified alterations in *RBI*, *TP53*, and *AR* as associated with poor outcomes<sup>9</sup>. Taking advantage  
116 of the single-cell resolution of our data, we examined cancer cells in our cohort to identify  
117 changes in expression in cells naïve and exposed to enzalutamide, which functions as a  
118 competitive inhibitor of AR that prevents nuclear localization and downstream transcriptional  
119 regulatory activity within cancer cells<sup>10</sup>. We scored cancer cells for expression of the MSigDB

120 hallmark gene sets and select literature-derived gene sets, including several reported as  
121 mediating resistance mechanisms, such as genes regulated by the glucocorticoid receptor or AR-  
122 V7 and genes associated with a neuroendocrine phenotype<sup>11–22</sup> (Methods). Compared to  
123 enzalutamide-naïve cells, exposed cells upregulated several MSigDB hallmark gene sets,  
124 including for EMT and TGF- $\beta$  signalling (Fig. 3a,b; Supplementary Table 1). We sought to  
125 corroborate these findings in a published cohort of bulk-sequenced mCRPC transcriptomes and  
126 found a similar effect for TGF- $\beta$  signalling upregulation in enzalutamide-exposed lymph node  
127 biopsies, although the number of exposed biopsies was small, and the effect was not statistically  
128 significant (Fig. 3c)<sup>9</sup>. We could not analyse bone biopsies due to scarcity of post-enzalutamide  
129 samples, and EMT scores were confounded with tumour purity, limiting our ability to draw  
130 conclusions from bulk sequencing for this specific finding (Supplementary Fig. 3).

### 131 *Small cell carcinoma regulatory programs*

132 One patient sample within our cohort derived from a small cell carcinoma, a rare  
133 aggressive form of prostate cancer that is not responsive to androgen-targeting therapies<sup>23</sup>. As  
134 expected, cancer cells from this biopsy differed drastically in their expression programs, with no  
135 detectable *AR* expression, strong downregulation of an *AR* regulated gene set, and marked  
136 upregulation of a gene set associated with neuroendocrine prostate cancer (Fig. 4a,b; Extended  
137 Data Fig. 1)<sup>12,14</sup>.

138 To mitigate overestimating the importance of idiosyncratic gene expression patterns from  
139 a single biopsy, we inferred transcriptional regulatory factor regulons using all cancer cells from  
140 our cohort and compared the inferred regulon activities between small cell carcinoma and  
141 adenocarcinoma cells<sup>24</sup>. Additionally, we scored small cell carcinoma and adenocarcinoma bulk  
142 transcriptomes from a published cohort for expression of the gene lists inferred to comprise each

143 regulatory factor's regulon<sup>9,22</sup> (Methods). Comparing our data and the published cohort, we  
144 observed concordant patterns of differential regulon activity between adenocarcinoma and small  
145 cell carcinoma (Fig. 4c). Among the transcriptional regulators with decreased activity in small  
146 cell carcinoma are *HOXB13*, which mediates *AR* regulatory activity and response to androgens,  
147 and *BHLHE40*, previously reported to be regulated by AR<sup>25-27</sup>. Several ETS family transcription  
148 factors showed reduced activity in small cell carcinoma, including *ETV1*, which increases  
149 prostate adenocarcinoma invasiveness, *EHF*, whose loss confers stem-like features, and *SPDEF*,  
150 an AR-regulated transcription factor whose downregulation promotes EMT<sup>28-30</sup>. On the other  
151 hand, considering transcriptional regulators with increased regulon expression in small cell  
152 carcinoma, we noted the stemness-promoting factors *NANOG* and *SOX2* and the epigenetic  
153 regulator *EZH2*, all of which have been reported to promote lineage plasticity and resistance to  
154 androgen-targeting therapies<sup>23,31-33</sup>. Among the transcriptional regulators with the most increased  
155 activity in small cell carcinoma cells are *E2F1*, which promotes cell cycle progression upon  
156 release from RB1 inhibition and is overexpressed in treatment-emergent small cell  
157 neuroendocrine prostate cancer and *LHX2*, previously reported in an expression signature of N-  
158 myc driven neuroendocrine prostate cancer<sup>34-36</sup>. We also observed increased activity of three  
159 transcriptional regulators whose role in small cell carcinoma has not been previously reported:  
160 *HOXB5* and *HOXB6*, two homeobox containing transcription factors, and *NR1D2*, a circadian  
161 rhythm regulator (Fig. 4c,d)<sup>37</sup>. Thus, even from a single small cell carcinoma case, we recover  
162 generalizable patterns of tumour-intrinsic expression differences, implicating both novel  
163 regulons and known transcription regulators mediating treatment resistance.

164 *Cytotoxic cell states and dynamics*



165 To provide a therapeutic axis independent of AR signalling and complementing tumour-  
166 intrinsic targeting modalities, clinical trials have tested immune checkpoint inhibitors in prostate  
167 cancer. While such therapies have yielded major improvements in a variety of solid tumours,  
168 responses in advanced prostate cancer have been muted<sup>1,2</sup>. To improve our understanding of the  
169 biology underlying this gap, we characterized infiltrating cytotoxic cells in the mCRPC  
170 microenvironment. We sub-clustered T and NK cells identified from initial clustering into 6  
171 clusters, including 2 CD4<sup>+</sup> T cell populations, 3 largely CD8<sup>+</sup> T cell populations, and a  
172 population of strongly CD16<sup>+</sup> and largely CD3<sup>-</sup> cells dominated by NK cells (Fig. 5a; Extended  
173 Data Fig. 2a). One population of CD8<sup>+</sup> T cells chiefly derived from bone biopsies was marked by  
174 expression of *CXCR4*, consistent with reports in mice that *CXCR4* is necessary for localization of  
175 CD8<sup>+</sup> T cells to the bone marrow and their subsequent survival<sup>38</sup> (Fig. 5b; Extended Data Fig. 2a,  
176 3a). This cluster had minimal expression of the effector molecule *GZMB*, while all three other  
177 cytotoxic clusters exhibited *GZMB* expression, albeit to varying degrees (Fig. 5b; Extended Data  
178 Fig. 2b). Another CD8<sup>+</sup> T cell population, largely derived from lymph node biopsies, was marked  
179 by expression of co-inhibitory receptors *PDCDI*, which encodes PD-1, and *HAVCR2*, which  
180 encodes TIM-3, along with elevated expression of *TOX*, *TIGIT*, *ICOS*, *FASLG*, and *LAG3* and  
181 minimal *TCF7* expression, suggestive of a dysfunctional effector phenotype (Fig. 5b; Extended  
182 Data Fig. 2b,e,f). This population exhibited elevated expression of both *ENTPDI* (encoding  
183 CD39, a marker of terminally exhausted CD8<sup>+</sup> T cells) and *ITGAE* (encoding CD103), whose co-  
184 expression identifies infiltrating cytotoxic cells reactive to cancer cells in other human  
185 cancers<sup>39,40</sup> (Extended Data Fig. 2c). Both the NK cell-dominant cluster and the remaining  
186 cytotoxic T cell cluster, which included CD8<sup>+</sup> T cells and likely  $\gamma\delta$  T cells, were marked by  
187 expression of *GNLY* and substantial fractions of cells expressing *CX3CRI* (Fig. 5b; Extended

188 Data Fig. 2d). Cells expressing *CX3CR1* also highly expressed *GZMB* and *PRFI*, consistent with  
189 previous reports that *CX3CR1* marks a CD8<sup>+</sup> T cell population with superior cytolytic function  
190 corresponding to a more differentiated effector phenotype that has been observed in models of  
191 chronic infection and other cancers<sup>41–43</sup>. We did not observe a distinct cluster of *TCF7* and  
192 *SLAMF6* dual-expressing progenitor cells previously reported to mediate response to anti-PD-1  
193 therapy in melanoma (Extended Data Fig. 2e,f)<sup>44</sup>. Broadly, these findings demonstrate that  
194 prostate cancer metastases are infiltrated by cytotoxic cells with distinct phenotypes, including  
195 dysfunctional and effector states relevant to therapy, that may vary based on metastatic site.

196         Next, we reconstructed T cell receptor (TCR) complementarity-determining region 3  
197 (CDR3) sequences in our scRNA-seq and corresponding bulk RNA-seq data to better understand  
198 the clonal dynamics of infiltrating T cells that expand in response to antigen stimulation. Groups  
199 of T cells forming part of an expanded clonotype group, indicated by a shared productive CDR3  
200 sequence, were detected in 6 patients. Clonotype groups detected in lymph node metastases were  
201 largely comprised of cells from the CD8<sup>+</sup> T cell cluster with elevated co-inhibitory receptor  
202 expression, while clonotype groups detected in bone metastases were largely comprised of cells  
203 from the *CXCR4*-expressing CD8<sup>+</sup> T cell cluster with low *GZMB* expression (Fig. 5d). In one  
204 bone biopsy (09171144), a large clonotype group was detected that included both cells from the  
205 *CXCR4*-expressing cluster and cells with high *CX3CR1* expression, indicating that cells derived  
206 from the same progenitor could take on both phenotypes.

207         From patient 01115655, we collected cells from biopsies taken both before and after  
208 treatment with enzalutamide and noted marked changes in the infiltrating T cell populations (Fig.  
209 5c,e). Before treatment, cytotoxic cells formed a minority of infiltrating T cells, which were  
210 dominated by a *SELL*-expressing CD4<sup>+</sup> T cell population and cells from a CD4<sup>+</sup> T regulatory

211 cell-enriched cluster with elevated *FOXP3* and *CTLA4* expression (Fig. 5c; Extended Data Fig.  
212 2a). Following treatment, the majority of infiltrating T cells were dysfunctional *PDCDI*-  
213 expressing CD8<sup>+</sup> T cells (Fig. 5c,e). Of note, for the clonotype group with the most cells  
214 recovered from this patient, we detected both the corresponding TCR $\alpha$  and TCR $\beta$  CDR3  
215 sequences in bulk RNA-seq of biopsies from both timepoints. As inferred from the bulk  
216 sequencing data, the clonal fraction increased sharply from ~5% before treatment to ~25% after  
217 treatment, making it the largest detected clone (Fig. 5f). All cells of this clonotype group detected  
218 in scRNA-seq were part of the *PDCDI*-expressing dysfunctional cluster. Collectively, these  
219 observations suggest that CD8<sup>+</sup> T cells can mount an aggressive response against cancer cells  
220 during enzalutamide treatment but also that they take on a dysfunctional phenotype that may  
221 limit sustained efficacy.

## 222 *Discussion*

223 To overcome limitations in bulk genomic characterization in uncovering cell-type  
224 specific contributions to therapeutic resistance in mCRPC, we describe the transcriptomes of  
225 individual cells collected from 15 biopsies covering diverse treatment histories, metastatic sites,  
226 and histological types. We find that only cancer cell expression significantly explains the  
227 sizeable inherited component of prostate cancer risk. Within small cell carcinoma, in addition to  
228 recapitulating expression programs promoting lineage plasticity, we identify novel regulators  
229 such as *HOXB5*, *HOBX6*, and *NR1D2*, which show dramatically increased activity both in our  
230 study and in an external cohort<sup>9,32,33</sup>. For adenocarcinomas, where resistance to second-  
231 generation androgen targeting therapies poses a major clinical challenge, significant attention is  
232 devoted to *AR* splice variants encoding constitutively active truncated proteins that promote  
233 resistance<sup>7,8</sup>. We find that *AR* splicing varies widely across cells within a single biopsy, with

234 multiple isoforms detectable in individual cells, including those naïve to second-generation  
235 androgen targeting therapies. These findings suggest that focused mechanistic understanding of  
236 individual isoforms may be insufficient and that additional studies on the overlapping regulatory  
237 activity of co-expressed *AR* splice variants are necessary to fully understand their role in  
238 therapeutic resistance. More broadly, we identify upregulation of expression programs associated  
239 with TGF- $\beta$  signalling and EMT following exposure to enzalutamide. This is consistent with  
240 evidence from pre-clinical models that inhibition of TGF- $\beta$  signalling promotes reversion of  
241 EMT and may sensitize cancer cells to enzalutamide<sup>45,46</sup>. Recent work focused on human  
242 mCRPC bone metastases identify tumour associated macrophages as a source of *TGFBI*  
243 expression, providing a target cell population for further study and possible therapeutic targeting  
244 (Baryawno, N. *et al.* manuscript submitted). Further studies of mCRPC shortly after initiation of  
245 enzalutamide may elucidate earlier cellular responses that ultimately precipitate EMT.

246         Within infiltrating CD8<sup>+</sup> T cells, a subset expressed dysfunction markers such as *PDCDI*,  
247 and this population included cells that underwent a dramatic clonal expansion within a patient  
248 after enzalutamide treatment, suggestive of tumour reactivity. The presence of this cell  
249 population may explain why some patients with advanced prostate cancer respond to immune  
250 checkpoint inhibition in combination with androgen-targeting therapies<sup>47</sup>. *ENTPDI* (CD39)  
251 expression in this population suggests that targeting immunosuppressive adenosine signalling  
252 may provide benefit in addition to targeting the PD-1 axis<sup>48</sup>. This population was uncommon in  
253 bone biopsies, which instead contained clonally expanded CD8<sup>+</sup> T cells with high effector  
254 molecule, low exhaustion marker, and *CX3CRI* expression. This cell state has previously been  
255 linked in model systems and other cancers to high cytolytic activity but poor proliferative  
256 potential and a requirement for CD4 help<sup>41–43</sup>. Similar cells have been reported as being

257 unresponsive to PD-L1 blockade, potentially explaining the poor performance of immune  
258 checkpoint inhibition in mCRPC bone metastases<sup>1,49</sup>. These results highlight the need for  
259 additional immunological dissection of mCRPC, where immune checkpoint inhibition has only  
260 been indicated for patients with tumour microsatellite instability<sup>1,2</sup>. Importantly, additional  
261 investigation should focus on systematic comparisons of bone and lymph node metastases to  
262 confirm whether the observed differences in cytotoxic cell infiltration are generalizable.  
263 Intriguingly, TGF- $\beta$  blockade was recently shown to promote response to immune checkpoint  
264 inhibition in prostate bone metastases in mice, potentially enabling rational therapeutic  
265 combinations to simultaneously act along both androgen and immune axes<sup>50</sup>. Taken together, we  
266 report multiple tumour and immune mechanisms across diverse mCRPC metastatic niches that  
267 contribute to treatment resistance and provide therapeutic opportunities for this lethal disease.

268 **References**

- 269 1. Boettcher, A. N. *et al.* Past, Current, and Future of Immunotherapies for Prostate Cancer.  
270 *Front. Oncol.* **9**, (2019).
- 271 2. Teo, M. Y., Rathkopf, D. E. & Kantoff, P. Treatment of Advanced Prostate Cancer. *Annu.*  
272 *Rev. Med.* **70**, 479–499 (2019).
- 273 3. Picelli, S. *et al.* Smart-seq2 for sensitive full-length transcriptome profiling in single cells.  
274 *Nat. Methods* **10**, 1096 (2013).
- 275 4. Mucci, L. A. *et al.* Familial Risk and Heritability of Cancer Among Twins in Nordic  
276 Countries. *JAMA* **315**, 68–76 (2016).
- 277 5. Schumacher, F. R. *et al.* Association analyses of more than 140,000 men identify 63 new  
278 prostate cancer susceptibility loci. *Nat. Genet.* **50**, 928 (2018).
- 279 6. Finucane, H. K. *et al.* Heritability enrichment of specifically expressed genes identifies  
280 disease-relevant tissues and cell types. *Nat. Genet.* **50**, 621–629 (2018).
- 281 7. Lu, J., der Steen, T. V. & Tindall, D. J. Are androgen receptor variants a substitute for the  
282 full-length receptor? *Nat. Rev. Urol.* **12**, 137–144 (2015).
- 283 8. Antonarakis, E. S. *et al.* AR-V7 and Resistance to Enzalutamide and Abiraterone in Prostate  
284 Cancer. *N. Engl. J. Med.* **371**, 1028–1038 (2014).
- 285 9. Abida, W. *et al.* Genomic correlates of clinical outcome in advanced prostate cancer. *Proc.*  
286 *Natl. Acad. Sci. U. S. A.* **116**, 11428–11436 (2019).
- 287 10. Tran, C. *et al.* Development of a Second-Generation Antiandrogen for Treatment of  
288 Advanced Prostate Cancer. *Science* **324**, 787–790 (2009).
- 289 11. Liberzon, A. *et al.* The Molecular Signatures Database Hallmark Gene Set Collection. *Cell*  
290 *Syst.* **1**, 417–425 (2015).

- 291 12. Arora, V. K. *et al.* Glucocorticoid Receptor Confers Resistance to Antiandrogens by  
292 Bypassing Androgen Receptor Blockade. *Cell* **155**, 1309–1322 (2013).
- 293 13. Hwang, J. H. *et al.* CREB5 Promotes Resistance to Androgen-Receptor Antagonists and  
294 Androgen Deprivation in Prostate Cancer. *Cell Rep.* **29**, 2355-2370.e6 (2019).
- 295 14. Beltran, H. *et al.* Divergent clonal evolution of castration-resistant neuroendocrine prostate  
296 cancer. *Nat. Med.* **22**, 298–305 (2016).
- 297 15. Li, Y. *et al.* Targeting cellular heterogeneity with CXCR2 blockade for the treatment of  
298 therapy-resistant prostate cancer. *Sci. Transl. Med.* **11**, (2019).
- 299 16. Yuan, F. *et al.* Molecular determinants for enzalutamide-induced transcription in prostate  
300 cancer. *Nucleic Acids Res.* **47**, 10104–10114 (2019).
- 301 17. Cato, L. *et al.* ARv7 Represses Tumor-Suppressor Genes in Castration-Resistant Prostate  
302 Cancer. *Cancer Cell* **35**, 401-413.e6 (2019).
- 303 18. Ragnum, H. B. *et al.* The tumour hypoxia marker pimonidazole reflects a transcriptional  
304 programme associated with aggressive prostate cancer. *Br. J. Cancer* **112**, 382–390 (2015).
- 305 19. Hu, R. *et al.* Distinct Transcriptional Programs Mediated by the Ligand-Dependent Full-  
306 Length Androgen Receptor and Its Splice Variants in Castration-Resistant Prostate Cancer.  
307 *Cancer Res.* **72**, 3457–3462 (2012).
- 308 20. Ertel, A. *et al.* RB-pathway disruption in breast cancer. *Cell Cycle* **9**, 4153–4163 (2010).
- 309 21. Saal, L. H. *et al.* Poor prognosis in carcinoma is associated with a gene expression signature  
310 of aberrant PTEN tumor suppressor pathway activity. *Proc. Natl. Acad. Sci.* **104**, 7564–7569  
311 (2007).
- 312 22. DeTomaso, D. *et al.* Functional interpretation of single cell similarity maps. *Nat. Commun.*  
313 **10**, 1–11 (2019).

- 314 23. Puca, L., Vlachostergios, P. J. & Beltran, H. Neuroendocrine Differentiation in Prostate  
315 Cancer: Emerging Biology, Models, and Therapies. *Cold Spring Harb. Perspect. Med.* **9**,  
316 a030593 (2019).
- 317 24. Aibar, S. *et al.* SCENIC: single-cell regulatory network inference and clustering. *Nat.*  
318 *Methods* **14**, 1083–1086 (2017).
- 319 25. Navarro, H. I. & Goldstein, A. S. HoxB13 mediates AR-V7 activity in prostate cancer. *Proc.*  
320 *Natl. Acad. Sci.* **115**, 6528–6529 (2018).
- 321 26. Norris, J. D. *et al.* The Homeodomain Protein HOXB13 Regulates the Cellular Response to  
322 Androgens. *Mol. Cell* **36**, 405–416 (2009).
- 323 27. Kiss, Z. & Ghosh, P. Abstract 2898: Elucidating the role of  
324 BHLHE40/DEC1/SHARP2/STRA13 in prostate cancer. *Cancer Res.* **76**, 2898–2898 (2016).
- 325 28. Baena, E. *et al.* ETV1 directs androgen metabolism and confers aggressive prostate cancer in  
326 targeted mice and patients. *Genes Dev.* **27**, 683–698 (2013).
- 327 29. Albino, D. *et al.* ESE3/EHF Controls Epithelial Cell Differentiation and Its Loss Leads to  
328 Prostate Tumors with Mesenchymal and Stem-like Features. *Cancer Res.* **72**, 2889–2900  
329 (2012).
- 330 30. Tsai, Y.-C. *et al.* Androgen deprivation therapy-induced epithelial-mesenchymal transition of  
331 prostate cancer through downregulating SPDEF and activating CCL2. *Biochim. Biophys.*  
332 *Acta Mol. Basis Dis.* **1864**, 1717–1727 (2018).
- 333 31. Borges, G. T. *et al.* Conversion of Prostate Adenocarcinoma to Small Cell Carcinoma-Like  
334 by Reprogramming. *J. Cell. Physiol.* **231**, 2040–2047 (2016).
- 335 32. Ku, S. Y. *et al.* Rb1 and Trp53 cooperate to suppress prostate cancer lineage plasticity,  
336 metastasis, and antiandrogen resistance. *Science* **355**, 78–83 (2017).



- 337 33. Mu, P. *et al.* SOX2 promotes lineage plasticity and antiandrogen resistance in TP53- and  
338 RB1-deficient prostate cancer. *Science* **355**, 84–88 (2017).
- 339 34. Lee, J. K. *et al.* N-Myc Drives Neuroendocrine Prostate Cancer Initiated from Human  
340 Prostate Epithelial Cells. *Cancer Cell* **29**, 536–547 (2016).
- 341 35. Aggarwal, R. R. *et al.* Whole-Genome and Transcriptional Analysis of Treatment-Emergent  
342 Small-Cell Neuroendocrine Prostate Cancer Demonstrates Intraclass Heterogeneity. *Mol.*  
343 *Cancer Res.* **17**, 1235–1240 (2019).
- 344 36. Rickman, D. S. *et al.* ERG Cooperates with Androgen Receptor in Regulating Trefoil Factor  
345 3 in Prostate Cancer Disease Progression. *Neoplasia N. Y. N* **12**, 1031–1040 (2010).
- 346 37. Cho, H. *et al.* Regulation of Circadian Behavior and Metabolism by Rev-erba and Rev-erbβ.  
347 *Nature* **485**, 123–127 (2012).
- 348 38. Goedhart, M. *et al.* CXCR4, but not CXCR3, drives CD8+ T-cell entry into and migration  
349 through the murine bone marrow. *Eur. J. Immunol.* **49**, 576–589 (2019).
- 350 39. Duhon, T. *et al.* Co-expression of CD39 and CD103 identifies tumor-reactive CD8 T cells in  
351 human solid tumors. *Nat. Commun.* **9**, 1–13 (2018).
- 352 40. Gupta, P. K. *et al.* CD39 Expression Identifies Terminally Exhausted CD8+ T Cells. *PLOS*  
353 *Pathog.* **11**, e1005177 (2015).
- 354 41. Zander, R. *et al.* CD4+ T Cell Help Is Required for the Formation of a Cytolytic CD8+ T  
355 Cell Subset that Protects against Chronic Infection and Cancer. *Immunity* **51**, 1028-1042.e4  
356 (2019).
- 357 42. Kanev, K. *et al.* Proliferation-competent Tcf1 CD8 T cells in dysfunctional populations are  
358 CD4 T cell help independent. *Proc. Natl. Acad. Sci.* **116**, 20070–20076 (2019).

- 359 43. Hudson, W. H. *et al.* Proliferating Transitory T Cells with an Effector-like Transcriptional  
360 Signature Emerge from PD-1+ Stem-like CD8+ T Cells during Chronic Infection. *Immunity*  
361 **51**, 1043-1058.e4 (2019).
- 362 44. Miller, B. C. *et al.* Subsets of exhausted CD8 + T cells differentially mediate tumor control  
363 and respond to checkpoint blockade. *Nat. Immunol.* **20**, 326–336 (2019).
- 364 45. Paller, C. *et al.* TGF- $\beta$  receptor I inhibitor enhances response to enzalutamide in a pre-  
365 clinical model of advanced prostate cancer. *The Prostate* **79**, 31–43 (2019).
- 366 46. Song, B. *et al.* Targeting FOXA1-mediated repression of TGF- $\beta$  signaling suppresses  
367 castration-resistant prostate cancer progression. *J. Clin. Invest.* **129**, 569–582.
- 368 47. Graff, J. N. *et al.* Early evidence of anti-PD-1 activity in enzalutamide-resistant prostate  
369 cancer. *Oncotarget* **7**, 52810–52817 (2016).
- 370 48. Leone, R. D. & Emens, L. A. Targeting adenosine for cancer immunotherapy. *J.*  
371 *Immunother. Cancer* **6**, 57 (2018).
- 372 49. Yamauchi, T., Hoki, T., Odunsi, K. & Ito, F. Identification of dysfunctional CD8+ T-cell  
373 subsets rescued by PD-L1 blockade in the tumor microenvironment. *J. Immunol.* **200**, 58.3-  
374 58.3 (2018).
- 375 50. Jiao, S. *et al.* Differences in Tumor Microenvironment Dictate T Helper Lineage Polarization  
376 and Response to Immune Checkpoint Therapy. *Cell* **179**, 1177-1190.e13 (2019).

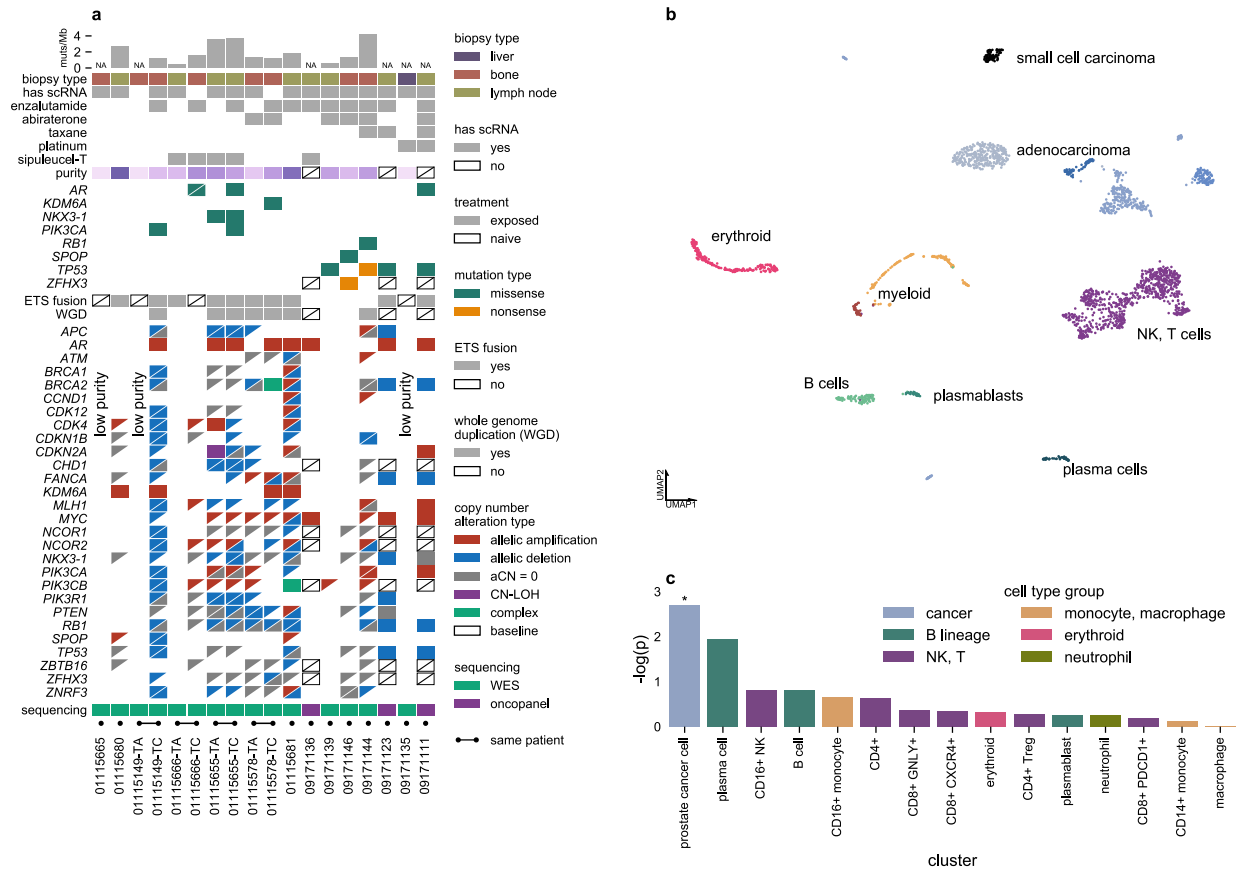

377

378 **Figure 1.** Cellular atlas of mCRPC, identifying heritability for prostate cancer enriched near  
 379 genes specifically expressed in prostate cancer cells.

380 **a)** Summary of clinical and select genomics features of patients and biopsies forming the study  
 381 cohort. Each column represents a single biopsy. Where available, multiple biopsies from the  
 382 same patient are displayed in adjacent columns. Patients are identified by numerical prefix, while  
 383 suffixes after a dash, when present, identify biopsies from the same patient. Boxes with diagonal  
 384 slashes indicate missing data, e.g. for genes not included in OncoPanel.

385 **b)** Projection of single-cell expression onto the first two dimensions of UMAP space. Each dot  
 386 represents a single cell, and colours correspond to clusters identified by the Louvain algorithm.  
 387 Clusters are manually labelled with dominant cell type(s) inferred from cluster-specific  
 388 expression of marker genes.

- 389 c) Enrichment of heritability for prostate cancer near genes specifically expressed in each cell  
390 type (compared to cell types in other cell type groups). \*: Benjamini-Hochberg FDR < 0.05

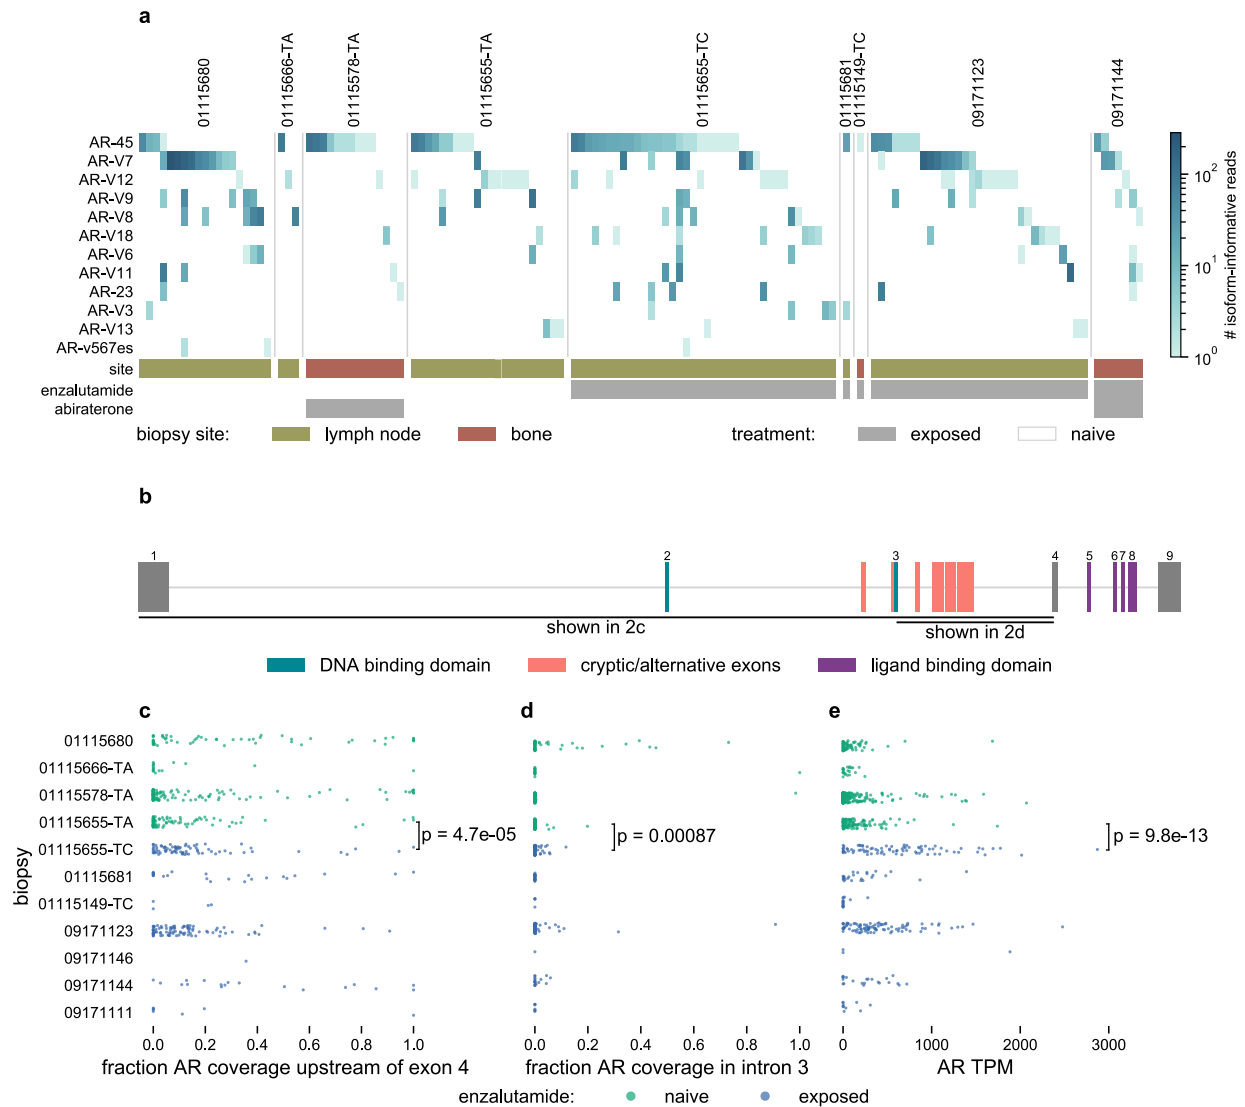

391

392 **Figure 2.** *AR* splicing varies widely across cells within the same tumour and across treatment

393 resistance states.

394 **a)** Heatmap displaying number of isoform-informative reads mapping to *AR* variants from single  
 395 cells. Each column represents *AR* variants detected in a single cell, with only cells that had at  
 396 least one isoform-informative read shown.

397 **b)** Schematic representation of *AR* locus. Rectangles indicate exons. Exons corresponding to the  
 398 full-length *AR* transcript are numbered, with exons comprising different functional domains  
 399 coloured. Select alternative exons included in *AR* splice variants are indicated.

400 **c)** Fraction of total *AR* coverage upstream of exon 4 (including the DNA-binding domain but  
401 excluding the ligand-binding domain) in single cells.  
402 **d)** Fraction of total *AR* coverage in intron 3 (including multiple cryptic/alternative exons  
403 included in truncated splice variants) in single cells.  
404 **e)** Total *AR* expression in single cells.  
405 **c, d, e)** *P* value compares cells before ( $n = 112$ ) and after ( $n = 83$ ) enzalutamide treatment for  
406 patient 01115655 (two-sided Mann-Whitney *U* test).

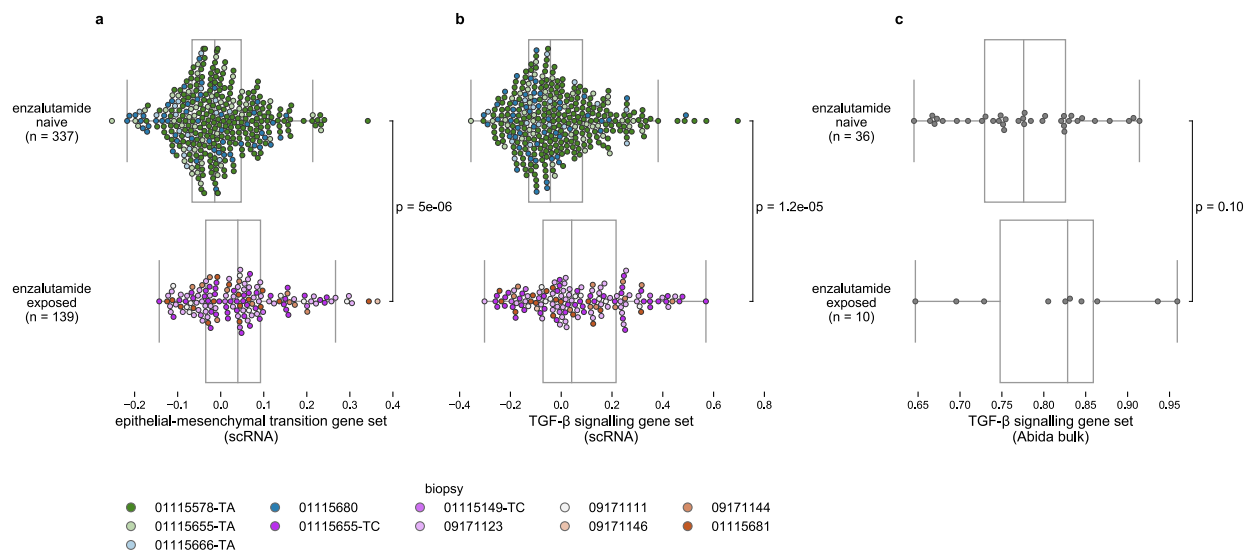

407

408 **Figure 3.** Enzalutamide-exposed adenocarcinoma cells upregulate expression programs

409 associated with epithelial-mesenchymal transition and TGF-β signalling.

410 **a, b)** Hallmark epithelial-mesenchymal transition and TGF-β signalling gene set expression

411 scores for individual cells collected before and after enzalutamide treatment. Each dot represents

412 a single cell and is coloured corresponding to biopsy. *P* values from two-sided Mann-Whitney *U*

413 test.

414 **c)** Hallmark TGF-β signalling gene set expression scores for bulk RNA-seq of prostate

415 adenocarcinoma lymph node biopsies<sup>9</sup> collected before and after enzalutamide treatment. Each

416 dot represents a single tumour. *P* value from one-sided Mann-Whitney *U* test.

417 Boxplots: centre line: median; box limits: upper and lower quartiles; whiskers extend at most

418 1.5x interquartile range past upper and lower quartiles.

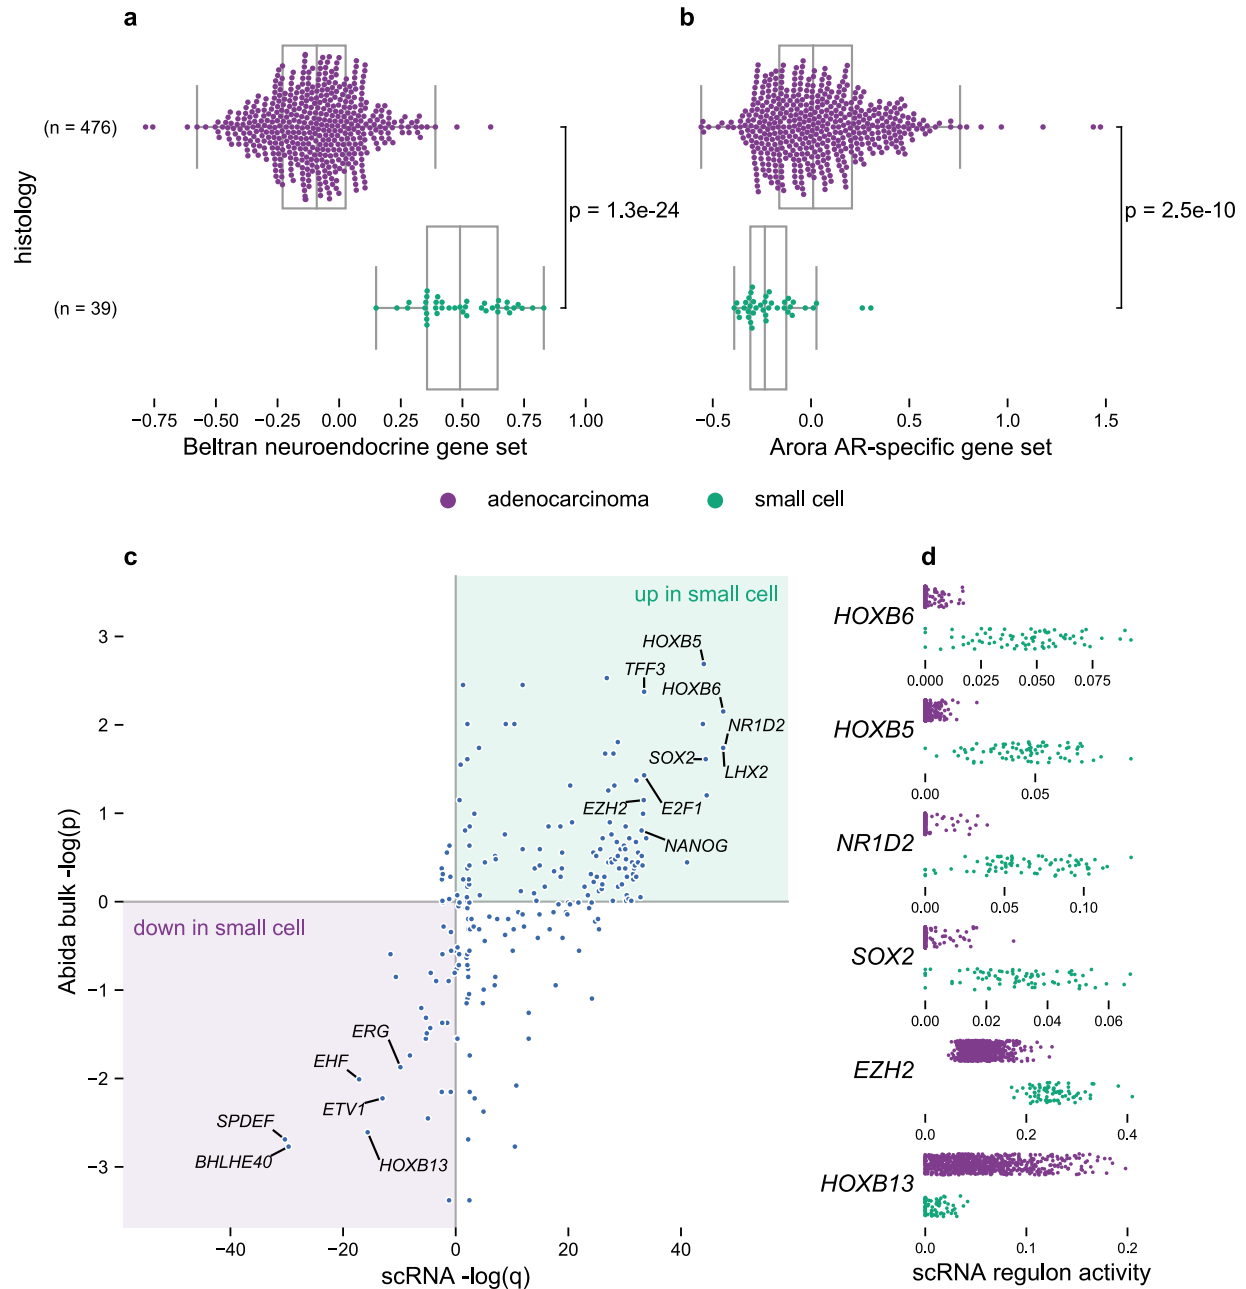

419

420 **Figure 4.** Cancer cells from small cell carcinoma are dominated by distinct regulons compared to  
 421 adenocarcinoma cells.

422 **a, b)** Gene set expression scores in single cells using an expression signature of neuroendocrine  
 423 prostate cancer<sup>14</sup> and of a set of genes under regulation by *AR*<sup>12</sup>. Boxplots: centre line: median;



424 box limits: upper and lower quartiles; whiskers extend at most 1.5x interquartile range past upper  
425 and lower quartiles.

426 **c)** Inferred activity of regulons of different transcriptional regulators. x-axis:  $q$ -values from  
427 comparison of inferred regulon activity in cancer cells from small cell carcinoma ( $n = 76$ ) vs  
428 cancer cells from adenocarcinomas ( $n = 188$ , sampled as described in Methods) (negative values  
429 indicate regulon is less active in small cell carcinoma; two-sided Mann-Whitney  $U$  test, median  
430 outcome of sampling iterations (Methods) with Bonferroni FWER correction). y-axis:  $P$  values  
431 (two-sided Mann-Whitney  $U$  test, signed as previous) from comparison of expression scores of  
432 scRNA-inferred regulons in bulk RNA-seq of small cell carcinomas ( $n = 8$ ) vs adenocarcinomas  
433 ( $n = 18$ ) from a published cohort<sup>9</sup>.

434 **d)** Regulon activity in single cells for select transcriptional regulators.

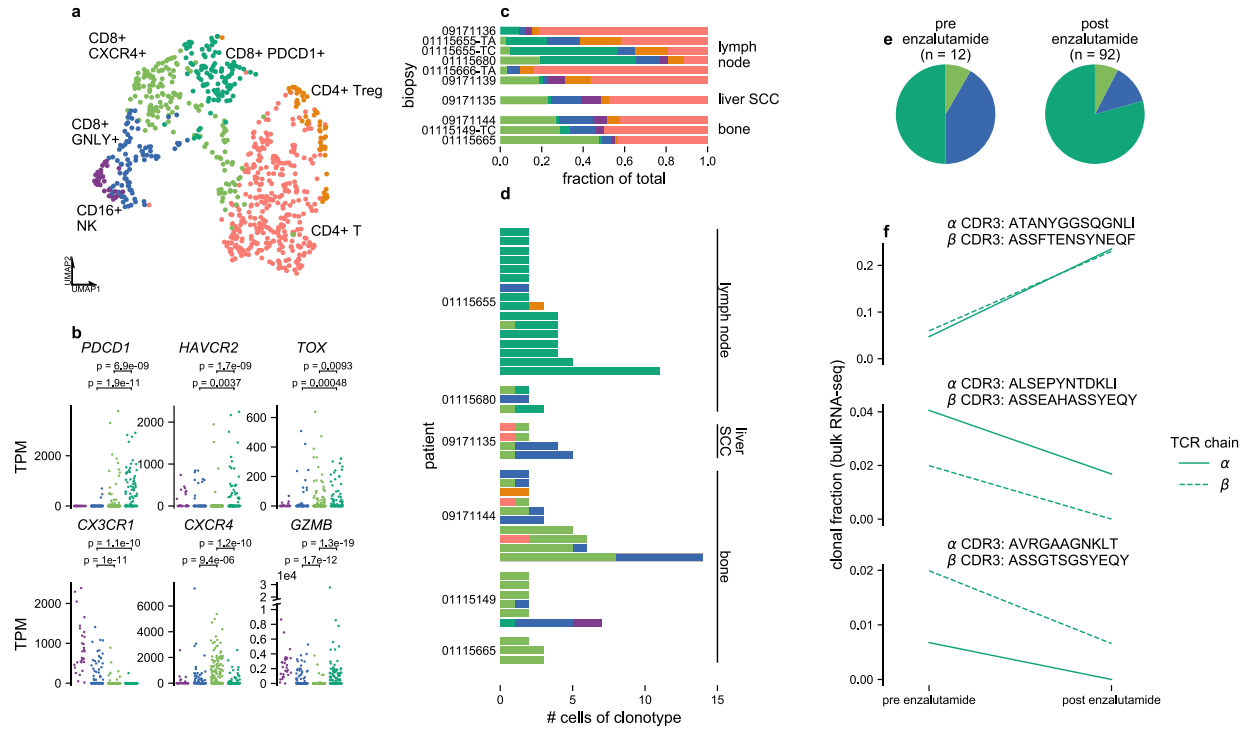

435

436 **Figure 5.** Clonally expanded cytotoxic lymphocytes have different effector phenotypes in  
 437 distinct metastatic niches.

438 **a)** Sub-clustering of NK and T cells. Each dot represents a single cell projected onto UMAP  
 439 space coloured corresponding to clustering via the Louvain algorithm. Clusters are manually  
 440 labelled with dominant phenotype/cell type from patterns of marker gene expression. Cluster  
 441 colours are used throughout subpanels.

442 **b)** Expression of select marker, effector, and co-inhibitory receptor genes within cytotoxic  
 443 clusters, CD16<sup>+</sup> NK (n = 30), CD8<sup>+</sup> GNLY<sup>+</sup> (n = 84), CD8<sup>+</sup> CXCR4<sup>+</sup> (n = 157), and CD8<sup>+</sup>  
 444 PDCD1<sup>+</sup> (n = 106). P values from two-sided Mann Whitney U test.

445 **c)** Proportions of cellular phenotypes from each biopsy, grouped by metastatic site, for all  
 446 biopsies from which high-quality T and NK cells were recovered.

447 **d)** T cell clonotypes from TCR reconstruction. Each bar represents cells sharing a reconstructed  
448 productive TCR CDR3 sequence and are grouped by patient. Colours indicate phenotype/cell  
449 type.

450 **e)** Proportions of cytotoxic cell phenotypes in patient 01115655 before and after enzalutamide  
451 treatment.

452 **f)** Changes in clonal fractions of cytotoxic T cell clonotypes in patient 01115655 following  
453 enzalutamide treatment. Each subplot corresponds to a single clonotype with TCR $\alpha$  and  $\beta$  CDR3  
454 amino acid sequences inferred from single-cell RNA-seq. Clonal fractions for the same CDR3  
455 sequences (matching at both nucleotide and amino acid level) inferred from TCR reconstruction  
456 in bulk RNA-seq are plotted. All detected single cells of the displayed clonotypes come from the  
457 *PDCDI*-expressing CD8<sup>+</sup> T cell cluster.

458 METHODS (2,578 words)

459 *Reference versions*

460 We used human genome reference b37 and the GENCODE<sup>51</sup> release 30 gene annotation  
461 lifted over to GRCh37.

462 *Statistical software*

463 Statistical tests were conducted with SciPy<sup>52</sup> v1.3.2 running on Python 3.7. R packages  
464 were run on R v3.5.1.

465 *Whole exome analyses*

466 For biopsies with paired tumour and normal samples available, we performed whole  
467 exome sequencing with a customized version of a previously described protocol<sup>53</sup>. After DNA  
468 shearing, hybridization and exome capture were performed using Illumina's Rapid Capture  
469 Exome Kit (with the exception of the normal sample for 01115149 and the tumour sample for  
470 biopsy 01115149-TA, which used the Agilent SureSelect Human All Exon 44Mb v2.0 bait set<sup>54</sup>).  
471 Libraries were sequenced with 76 bp paired-end reads on an Illumina instrument.

472 Reads were aligned using BWA<sup>55</sup> v0.5.9 and somatic mutations called using a customized  
473 version of the Getz Lab CGA WES Characterization pipeline  
474 ([https://portal.firecloud.org/#methods/getzlab/CGA\\_WES\\_Characterization\\_Pipeline\\_v0.1\\_Dec2018/](https://portal.firecloud.org/#methods/getzlab/CGA_WES_Characterization_Pipeline_v0.1_Dec2018/))  
475 developed at the Broad Institute. Briefly, we used ContEst<sup>56</sup> to estimate contamination,  
476 MuTect<sup>57</sup> and Strelka<sup>58</sup> to call SNVs and indels, DeTiN<sup>59</sup> to estimate tumour-in-normal  
477 contamination, and Orientation Bias Filter<sup>60</sup> and MAFPoNFilter<sup>61</sup> to filter sequencing artefacts.  
478 Variants were annotated using VEP<sup>62</sup>, Oncotator<sup>63</sup>, and vcf2maf v1.6.17  
479 (<https://github.com/mskcc/vcf2maf>). Copy number alterations, purity, ploidy, and whole genome

480 doubling status were called using FACETS<sup>64</sup> v0.5.14. Copy number alterations were evaluated  
481 with respect to whole genome doubling status.

#### 482 *OncoPanel*

483 For biopsies where whole exome sequencing failed, somatic mutation calls, copy number  
484 alterations, and ETS fusion status were taken from OncoPanel, a clinical panel sequencing test  
485 available at DFCI<sup>65</sup>.

#### 486 *Sample collection and dissociation for single-cell RNA-seq*

487 Tumour samples were collected and transported in Dulbecco's Modified Eagle Medium,  
488 high glucose, pyruvate ("DMEM", ThermoFisher Scientific, #11995073) on ice. Single-cell  
489 suspensions for single-cell RNA-seq were obtained from tumour core needle biopsies through  
490 mechanical and enzymatic dissociation. Samples were first cut into pieces smaller than 1 mm<sup>3</sup>  
491 using a scalpel. For bone biopsies, soft tissue was also scraped from the hard bone surface using  
492 a scalpel blade. Samples were then dissociated using one of two protocols, chiefly to optimize  
493 for yield of viable cells from different metastatic sites. Cells obtained from the two protocols  
494 were comparable, and findings were consistent in sub-analyses of cells processed with the same  
495 protocol (Supplementary Fig. 4).

496 For biopsies, 01115655-TC, 01115666-TA, 01115680, 01115681, 09171111, 09171135,  
497 09171136, and 09171139, the resulting tissue fragments were incubated in 3 mL Accumax  
498 (Innovative Cell Technologies, #AM105) for 10 min at room temperature on a rocking shaker  
499 ("ACC" protocol). Cell suspensions were then filtered with a 100 µm cell strainer (ThermoFisher  
500 Scientific #08-771-19) and spun at 580 g for 5 min at 4°C. In cases where cell pellets appeared  
501 bloody, red blood cells were lysed with ACK Lysing Buffer (ThermoFisher Scientific,  
502 #A1049201) on ice for 1 min, followed by quenching with PBS and an additional centrifugation.

503 The final cell pellet was resuspended in PBS (Fisher Scientific, #MT21040CV) with 2% FBS  
504 (Gemini Bio-Products, #100-106).

505 For biopsies 01115655-TA, 01115665, 01115149-TC, 01115578-TA, 09171123,  
506 09171144, and 09171146, tissue fragments were incubated in 2-3 mL Medium 199, Earle's Salts  
507 ("M199", ThermoFisher Scientific, #11150059) with 1 mg/mL Collagenase 4 (Fisher Scientific,  
508 #NC9836075), and 10-20 µg/mL DNase I (StemCell Technologies, #7900) for 5-10 min in a  
509 37°C water bath with intermittent mixing, followed by additional mixing and pipetting ("CD"  
510 protocol). Cell suspensions were then filtered with a 100 µm cell strainer, spun at 580 g for 5 min  
511 at 4°C, and the resulting pellet resuspended in PBS with 2% FBS. The blood clot from biopsy  
512 09171144 was processed in a similar manner, with the exception that red blood cells were lysed  
513 with ACK Lysing Buffer on ice at 5-minute increments for a total of 15 min. For the bone  
514 marrow aspirate from biopsy 09171144, mechanical and enzymatic dissociation were not  
515 performed, and red blood cells were lysed with ACK Lysing Buffer on ice at 5-minute  
516 increments for a total of 10 min.

#### 517 *Single-cell sorting*

518 Single cell suspensions in PBS with 2% FBS were stained by incubating for 15 minutes  
519 at room temperature protected from light with anti-human PTPRC (CD45) monoclonal antibody  
520 conjugated to FITC (1:200 dilution, VWR #ABNOMAB12230), anti-human EPCAM antibody  
521 conjugated to PE (1:50 dilution, Miltenyi Biotec #130-091-253), and either Calcein-AM (1:200  
522 dilution, ThermoFisher Scientific #C3100MP; biopsies 01115655-TA and 01115665), 7-  
523 Aminoactinomycin D (7-AAD) (1:200 dilution, ThermoFisher Scientific #A1310; all other  
524 biopsies except sample 01115149-TC), or both (sample 01115149-TC). We first sorted cells with  
525 biological dimensions (high FSC-A and high SSC-A), selected single cells, and excluded

526 doublets or triplets (low FSC-W). Next, we sorted live cells (low 7AAD/ high Calcein-AM) that  
527 were CD45<sup>+</sup> (high FITC, enriching for immune cells), EPCAM<sup>+</sup> (high PE, enriching for cancer  
528 cells), or double negative (low FITC/low PE, only in biopsy 09171144) (see Supplementary Fig.  
529 5 for example gating). Cell sorting was performed using a BD Biosciences FACSria cell sorter  
530 (Ilu or UV) with FACSDiva software. Individual cells were sorted into the wells of 96-well  
531 plates with 10  $\mu$ L TCL buffer (Qiagen, #1070498) with 1% beta-mercaptoethanol (Sigma 63689)  
532 per well. Plates were then sealed, vortexed for 10 s, spun at 3,700 rpm for 2 min at 4°C, and  
533 frozen on dry ice.

#### 534 *Transcriptome sequencing, alignment, and quantification*

535 Library preparation for bulk RNA-seq was performed using the Illumina TruSeq Stranded  
536 mRNA Sample Preparation Kit (except for biopsy 01115149-TA, which was prepared using the  
537 unstranded Illumina TruSeq RNA Sample Preparation protocol (Revision A, 2010)). Libraries  
538 were sequenced with 101 bp paired-end reads (except biopsy 01115149-TA, which was  
539 sequenced with 76bp paired-end reads) on an Illumina instrument.

540 For scRNA-seq, RNA was captured from single-cell lysates with 2.2x RNAClean SPRI  
541 beads (Beckman Coulter Genomics) without the final elution<sup>67</sup>. After air drying and secondary  
542 structure denaturation at 72°C for three minutes, library construction was performed using a  
543 slightly customized Smart-seq2 protocol<sup>66</sup> with 21 cycles of PCR for preamplification. cDNA  
544 was purified with 0.8x Ampure SPRI beads (Beckman Coulter Genomics) and eluted in 21  $\mu$ L  
545 TE buffer. During tagmentation and PCR amplification, we used 0.2ng of cDNA per cell and  
546 one-eighth of the Illumina NexteraXT (Illumina FC-131-1096) reaction volume. Individual cells  
547 were sequenced to a mean depth of ~1.5 million 38 bp paired-end reads on an Illumina NextSeq  
548 500 instrument with 75 cycle high output kits (Illumina TG-160-2005).

549           After adapter trimming with cutadapt<sup>68</sup> v2.2, reads were aligned using STAR aligner<sup>69</sup>  
550 v2.7.2b with parameters: --outFilterMultimapNmax 20 --outFilterMismatchNmax 999 --  
551 outFilterMismatchNoverReadLmax 0.04 --alignIntronMin 20 --alignMatesGapMax 1250000 --  
552 alignIntronMax 1250000 --chimSegmentMin 12 --chimJunctionOverhangMin 12 --  
553 alignSJstitchMismatchNmax 5 -1 5 5 --chimMultimapScoreRange 3 --  
554 chimScoreJunctionNonGTAG -4 --chimMultimapNmax 20 --chimNonchimScoreDropMin 10 --  
555 peOverlapNbasesMin 12 --peOverlapMmp 0.1 --chimOutJunctionFormat 1. sjdbOverhang was  
556 set to 1 less than the untrimmed read length. We used multi-sample 2-pass mapping for all  
557 samples from each patient, first mapping all samples (bulk and single-cell transcriptomes),  
558 merging the SJ.out.tab files, then running the second pass with the jointly called splice junctions.  
559 STAR BAMs were passed into Salmon<sup>70</sup> v0.14.1 to generate gene-level transcript per million  
560 (TPM) quantifications with parameters: --incompatPrior 0.0 --seqBias --gcBias --  
561 reduceGCMemory --posBias. STAR chimeric junctions were supplied to STAR-Fusion<sup>71</sup> v1.7.0 in  
562 kickstart mode to call ETS family fusions.

### 563 *Single-cell quality control and clustering*

564           After removing low quality cells (fewer than 500 or more than 10,000 detected genes,  
565 fewer than 50,000 reads, or more than 25% expression from mitochondrial genes), we used  
566 Seurat<sup>72</sup> v3.1.0 to perform first-pass clustering using the TPM matrix rescaled to exclude  
567 mitochondrial genes. We manually identified and removed a small number of cells with  
568 anomalous expression patterns (chiefly co-expression of high levels of haemoglobin with marker  
569 genes for non-erythroid cells). Additionally, some cells that did not cluster with erythroid cells  
570 (easily identified with dominant haemoglobin expression) nonetheless had low levels of  
571 haemoglobin detected, suggestive of contamination from ambient RNA released from lysed  
572 erythroid cells. To account for this, we identified genes whose expression was correlated



573 (Pearson correlation > 0.2) with total haemoglobin expression levels in non-erythroid cells with  
574 detectable haemoglobin. This consisted of a small set of genes with known function in erythroid  
575 cell development and function: *AHSP*, *GATA1*, *CAI*, *EPB42*, *KLF1*, *SLC4A1*, *CA2*, *GYP A*, *TFR2*,  
576 *RHAG*, *FAXDC2*, *RHD*, *ALAS2*, *SPTA1*, and *BLVRB*. To mitigate batch effects driven by  
577 different degrees of contaminating ambient erythroid transcripts, we removed these genes, along  
578 with the genes encoding haemoglobin subunits, from the expression matrix for all non-erythroid  
579 cells.

580 We repeated the clustering and conducted all downstream analyses with the filtered  
581 expression matrix. After joint clustering of all cells (Fig. 1b), we performed sub-clustering on 3  
582 cell subsets: 1) NK and T cells 2) B-lineage cells 3) myeloid cells. We manually labelled clusters  
583 by dominant cell identity, as assessed by marker gene expression patterns (Supplementary Table  
584 2). Briefly, cancer cell clusters were identified by expression of *AR*, *KLK3*, or *CHGA*; T cell  
585 populations by *CD3D* and *CD3G*; Tregs by *CD4*, *FOXP3*, and *CTLA4*; NK cells by absence of  
586 *CD3D* and *CD3G* and expression of *FCGR3A*, *FCGR3B*, and *GZMB*; erythroid cells by *HBA* and  
587 *HBB*; neutrophils by *ELANE*, *CEACAM8*, *AZU1*, and *DEF A1*; macrophages by *APOE*, *CIQA*,  
588 and *CIQB*; monocytes by *ITGAX*, *CD14*, *FCGR3A*, and *FCGR3B*; B cells by *CD19* and *MS4A1*;  
589 plasmablasts by *CD19* and absence of *MS4A1*; and plasma cells by *SDCI* and high expression of  
590 immunoglobulin genes. Additionally, we confirmed the identity of cancer cell clusters by  
591 matching transcriptome-inferred copy number alteration profiles generated from inferCNV  
592 v0.99.7 (<https://github.com/broadinstitute/inferCNV>) with those obtained from corresponding  
593 bulk whole exome sequencing.

594 *Cluster specifically expressed genes and LDSC-SEG*

595 We grouped cell clusters into ‘superclusters’ of related cell types (Supplementary Table 2)  
596 and performed differential expression to identify markers for each cell cluster, omitting cells in  
597 the same supercluster. To mitigate uneven representation of cell types, when comparing against  
598 any cluster, we subsampled the same number of cells from each other supercluster and used as  
599 even representation as possible of the contained clusters. In determining cancer cell markers, we  
600 used as even representation as possible of cells from each biopsy while sampling 200 cancer  
601 cells total per iteration. For each cluster, we repeated the sampling 500 times. In each sampling,  
602 we performed a one-sided Mann Whitney  $U$  test for differential expression on all genes with at  
603 least 1 TPM expression in at least 10% of the cluster’s cells. We then selected the top 10% most  
604 upregulated genes (lowest median  $P$  value across samplings) as cluster specifically expressed  
605 genes. We used a 100kb interval around genes for heritability partitioning with LDSC-SEG  
606 v1.0.1, additionally including an annotation corresponding to all genes and the baseline v1.1  
607 model<sup>6</sup>.

#### 608 *AR isoform-informative reads*

609 To identify reads that uniquely map to an *AR* splice variant, we generated a FASTA  
610 transcriptome annotation of spliced sequences from isoforms described in literature<sup>7,73–79</sup>. We  
611 extracted all reads initially mapped by STAR to the *AR* genomic interval X:66753830-67011796  
612 and then remapped them to our *AR* isoform transcriptome, disallowing clipping, multimapping,  
613 or chimeric reads, and requiring end-to-end mapping (STAR parameters: --  
614 outFilterMultimapNmax 1 --alignEndsType EndToEnd --alignSoftClipAtReferenceEnds No --  
615 outFilterMismatchNmax 999 --outFilterMismatchNoverReadLmax 0.04 --peOverlapNbasesMin  
616 10). As our *AR* isoform transcriptome corresponded to transcript sequences *after* splicing, we  
617 further excluded reads that mapped with gaps corresponding to additional inferred splice events.  
618 We reported all reads that mapped uniquely to an isoform with at most 1 mismatch in Figure 2a.

619 *Gene set scoring, regulon activity*

620 For both bulk samples and single cells, we scored the activity of gene sets with VISION<sup>22</sup>  
621 v2.0.0. From single cancer cells, we inferred regulons and transcriptional regulatory factor  
622 activity with SCENIC<sup>24</sup> v1.1.2.2. In Figure 4, for single cells, we used SCENIC AUC directly as  
623 a measure of regulon activity. For Figure 4c, to infer regulon activity in bulk samples, we  
624 extracted the gene sets corresponding to regulons from SCENIC and scored bulk samples for  
625 activity of the genes sets using VISION.

626 When comparing VISION scores in cells from biopsies exposed and naïve to treatment  
627 with enzalutamide, we included only cells inferred to be in G1 by Seurat to reduce discovery of  
628 signals introduced by different proportions of cycling cells between tumours<sup>72</sup>. We restricted our  
629 initial analyses to biopsies with at least 10 G1 cancer cells. As we were interested in  
630 generalizable patterns of expression change related to enzalutamide exposure, we attempted to  
631 filter out signals driven primarily by expression patterns in any single biopsy by undertaking a  
632 subsampling procedure. By considering subsets of the data more balanced for representation  
633 from different biopsies, we traded reduced power for more robustness. From either class  
634 (enzalutamide naïve vs exposed), we sampled up to 20 cells per biopsy to prevent results from  
635 being dominated by tumours with many recovered cells. Additionally, across repeated sampling  
636 iterations, we omitted each biopsy in turn, instead sampling cells from other biopsies within its  
637 class, keeping the total number of cells the same. We performed 501 iterations of sampling for  
638 each biopsy being excluded. For each gene set being scored with VISION, we used the sampling  
639 with the median effect size as the summary of all iterations. When measuring effect size, we  
640 consistently compared one class vs the other (i.e. always exposed relative to naïve) to ensure

641 consistency in comparisons of direction of effect. We used the corresponding two-sided Mann  
642 Whitney  $U$  test  $P$  value as the nominal  $P$  value for the given gene set.

643 We additionally took the following steps to filter results that appeared to be driven by a  
644 single biopsy: for any given biopsy, we compared samplings when cells from the biopsy were  
645 held out vs when cells from the biopsy were included. If the proportion of nominally significant  
646 results ( $P < 0.05$ , same direction of effect as the overall median outcome for the given signature)  
647 when the biopsy was excluded was less than 80% of the proportion of nominally significant  
648 results when the biopsy was included, we considered any overall finding of differential gene set  
649 expression as non-robust and did not report it. We reported signatures with FDR  $< 0.05$  in  
650 Supplementary Table 1<sup>80</sup>. Note that  $P$  values shown in Figures 3a, 3b, 4a, and 4b are based on all  
651 G1 cells and confirmed the findings from this sampling approach.

652 For comparisons of regulon activity in small cell carcinoma and adenocarcinoma, we  
653 took a similar approach, except that in comparing SCENIC AUC scores, we did not restrict to  
654 only G1 cells, as the regulons had been inferred with all cancer cells together. As there was one  
655 small cell carcinoma biopsy, cells from that biopsy were never selected for omission across  
656 samplings.

#### 657 *Bulk RNA-seq analyses of Abida cohort*

658 In Figures 3c and 4c, we compared our findings to bulk RNA-seq data from a published  
659 cohort<sup>9</sup>. Clinical annotations and expression quantifications were obtained from the published  
660 supplementary materials and from the authors directly. We converted gene expression values  
661 from FKPM to TPM for consistency with the rest of our study. As this cohort included samples  
662 sequenced at different centres and from different metastatic sites, we further restricted our  
663 analyses to avoid batch effects. For Figure 3c, we analysed only samples sequenced via

664 transcriptome capture at the University of Michigan, as this was the largest identifiably  
665 uniformly sequenced subset. For Figure 4c, as the largest number of small cell carcinoma  
666 samples were sequenced at Cornell, we included only small cell carcinoma and adenocarcinoma  
667 cases from Cornell in our analyses.

#### 668 *TCR reconstruction*

669 We performed TCR reconstruction and clonotype inference from single-cell RNA-seq  
670 with TraCeR<sup>81</sup> v0.6.0. We performed TCR reconstruction and estimation of clonal fraction from  
671 bulk RNA-seq using MiXCR<sup>82</sup> v3.0.12. TCRs were inferred as detected in both bulk and single-  
672 cell RNA-seq if the CDR3 nucleic acid (and therefore amino acid) sequence matched.

673 **Methods References**

- 674 51. Frankish, A. *et al.* GENCODE reference annotation for the human and mouse genomes.  
675 *Nucleic Acids Res.* **47**, D766–D773 (2019).
- 676 52. Virtanen, P. *et al.* SciPy 1.0: fundamental algorithms for scientific computing in Python. *Nat.*  
677 *Methods* 1–12 (2020) doi:10.1038/s41592-019-0686-2.
- 678 53. Fisher, S. *et al.* A scalable, fully automated process for construction of sequence-ready  
679 human exome targeted capture libraries. *Genome Biol.* **12**, R1 (2011).
- 680 54. Gnirke, A. *et al.* Solution hybrid selection with ultra-long oligonucleotides for massively  
681 parallel targeted sequencing. *Nat. Biotechnol.* **27**, 182–189 (2009).
- 682 55. Li, H. & Durbin, R. Fast and accurate short read alignment with Burrows–Wheeler  
683 transform. *Bioinformatics* **25**, 1754–1760 (2009).
- 684 56. Cibulskis, K. *et al.* ContEst: estimating cross-contamination of human samples in next-  
685 generation sequencing data. *Bioinforma. Oxf. Engl.* **27**, 2601–2602 (2011).
- 686 57. Cibulskis, K. *et al.* Sensitive detection of somatic point mutations in impure and  
687 heterogeneous cancer samples. *Nat. Biotechnol.* **31**, 213–219 (2013).
- 688 58. Saunders, C. T. *et al.* Strelka: accurate somatic small-variant calling from sequenced tumor-  
689 normal sample pairs. *Bioinforma. Oxf. Engl.* **28**, 1811–1817 (2012).
- 690 59. Taylor-Weiner, A. *et al.* DeTiN: overcoming tumor-in-normal contamination. *Nat. Methods*  
691 **15**, 531–534 (2018).
- 692 60. Costello, M. *et al.* Discovery and characterization of artifactual mutations in deep coverage  
693 targeted capture sequencing data due to oxidative DNA damage during sample preparation.  
694 *Nucleic Acids Res.* **41**, e67 (2013).

- 695 61. Lawrence, M. S. *et al.* Discovery and saturation analysis of cancer genes across 21 tumour  
696 types. *Nature* **505**, 495–501 (2014).
- 697 62. McLaren, W. *et al.* The Ensembl Variant Effect Predictor. *Genome Biol.* **17**, 122 (2016).
- 698 63. Ramos, A. H. *et al.* Oncotator: cancer variant annotation tool. *Hum. Mutat.* **36**, E2423-2429  
699 (2015).
- 700 64. Shen, R. & Seshan, V. E. FACETS: allele-specific copy number and clonal heterogeneity  
701 analysis tool for high-throughput DNA sequencing. *Nucleic Acids Res.* **44**, e131–e131  
702 (2016).
- 703 65. Garcia, E. P. *et al.* Validation of OncoPanel: A Targeted Next-Generation Sequencing Assay  
704 for the Detection of Somatic Variants in Cancer. *Arch. Pathol. Lab. Med.* **141**, 751–758  
705 (2017).
- 706 66. Picelli, S. *et al.* Full-length RNA-seq from single cells using Smart-seq2. *Nat. Protoc.* **9**,  
707 171–181 (2014).
- 708 67. Shalek, A. K. *et al.* Single-cell transcriptomics reveals bimodality in expression and splicing  
709 in immune cells. *Nature* **498**, 236–240 (2013).
- 710 68. Martin, M. Cutadapt removes adapter sequences from high-throughput sequencing reads.  
711 *EMBnet.journal* **17**, 10–12 (2011).
- 712 69. Dobin, A. *et al.* STAR: ultrafast universal RNA-seq aligner. *Bioinformatics* **29**, 15–21  
713 (2013).
- 714 70. Patro, R., Duggal, G., Love, M. I., Irizarry, R. A. & Kingsford, C. Salmon: fast and bias-  
715 aware quantification of transcript expression using dual-phase inference. *Nat. Methods* **14**,  
716 417–419 (2017).

- 717 71. Haas, B. J. *et al.* Accuracy assessment of fusion transcript detection via read-mapping and de  
718 novo fusion transcript assembly-based methods. *Genome Biol.* **20**, 213 (2019).
- 719 72. Butler, A., Hoffman, P., Smibert, P., Papalexi, E. & Satija, R. Integrating single-cell  
720 transcriptomic data across different conditions, technologies, and species. *Nat. Biotechnol.*  
721 **36**, 411–420 (2018).
- 722 73. Robinson, D. *et al.* Integrative Clinical Genomics of Advanced Prostate Cancer. *Cell* **161**,  
723 1215–1228 (2015).
- 724 74. Hu, R. *et al.* Ligand-independent androgen receptor variants derived from splicing of cryptic  
725 exons signify hormone-refractory prostate cancer. *Cancer Res.* **69**, 16–22 (2009).
- 726 75. Watson, P. A. *et al.* Constitutively active androgen receptor splice variants expressed in  
727 castration-resistant prostate cancer require full-length androgen receptor. *Proc. Natl. Acad.*  
728 *Sci. U. S. A.* **107**, 16759–16765 (2010).
- 729 76. Lu, C. & Luo, J. Decoding the androgen receptor splice variants. *Transl. Androl. Urol.* **2**,  
730 178–186 (2013).
- 731 77. Hu, D. G. *et al.* Identification of androgen receptor splice variant transcripts in breast cancer  
732 cell lines and human tissues. *Horm. Cancer* **5**, 61–71 (2014).
- 733 78. Hu, R., Isaacs, W. B. & Luo, J. A snapshot of the expression signature of androgen receptor  
734 splicing variants and their distinctive transcriptional activities. *The Prostate* **71**, 1656–1667  
735 (2011).
- 736 79. Sun, S. *et al.* Castration resistance in human prostate cancer is conferred by a frequently  
737 occurring androgen receptor splice variant. *J. Clin. Invest.* **120**, 2715–2730 (2010).



- 738 80. Benjamini, Y. & Hochberg, Y. Controlling the False Discovery Rate: A Practical and  
739 Powerful Approach to Multiple Testing. *J. R. Stat. Soc. Ser. B Methodol.* **57**, 289–300  
740 (1995).
- 741 81. Stubbington, M. J. T. *et al.* T cell fate and clonality inference from single-cell transcriptomes.  
742 *Nat. Methods* **13**, 329–332 (2016).
- 743 82. Bolotin, D. A. *et al.* MiXCR: software for comprehensive adaptive immunity profiling. *Nat.*  
744 *Methods* **12**, 380–381 (2015).

745 ACKNOWLEDGEMENTS

746 We thank the patients who participated in this study. This work was supported by the  
747 National Science Foundation (GRFP DGE1144152 (M.X.H.)), the National Institutes of Health  
748 (T32 GM008313 (M.X.H.), T32 CA009172 (A.K.T), K08 CA234458 (D.L.), K08 CA222663  
749 (B.I.), R01 CA227388 (E.M.V.A), and U01CA233100 (L.F. and E.M.V.A.)), a Burroughs  
750 Wellcome Fund Career Award for Medical Scientists (B.I.), the Conquer Cancer Foundation  
751 (D.L.), the Society for Immunotherapy of Cancers (D.L.), the Prostate Cancer Foundation (L.F.),  
752 a Mark Foundation Emerging Leader Award (E.M.V.A.), a Dana-Farber Medical Oncology  
753 Translational grant (A. Rotem and E.M.V.A.), and a PCF-V Foundation Challenge Award  
754 (E.M.V.A.). Any opinions, findings, and conclusions or recommendations expressed in this  
755 material are those of the authors and do not necessarily reflect the views of the National Science  
756 Foundation.

757 AUTHOR CONTRIBUTIONS

758 M.X.H., A. Rotem, A. Regev, M.-E.T., and E.M.V.A. conceived and designed the overall  
759 study. M.S.C., A.K., M.-J.S., and C.R. processed the samples and prepared libraries for scRNA-  
760 seq. L.D., J.P., A. Rotem, and O.R.-R. supervised and organized the sample collection and  
761 preparation. P.S., B.I., and A. Rotem developed the tissue dissociation protocols. Z.Z., L.D.,  
762 Z.B., and A.K.T. collected the clinical information. M.X.H. and J.C. analysed the bulk exome  
763 sequencing data. M.X.H. performed the heritability enrichment analysis. M.X.H. and A.B.-M.  
764 analysed *AR* splicing. M.X.H., D.L., and N.I.K. contributed to the analysis of enzalutamide  
765 resistance. M.X.H. and K.B. performed the single-cell regulon analyses. M.X.H., K.B., and  
766 K.P.B. analysed the immune cells. M.X.H., L.F., M.-E.T., and E.M.V.A. interpreted the data.

767 M.X.H., S.V., and E.M.V.A. wrote the manuscript. All authors reviewed and approved the final  
768 manuscript.

#### 769 COMPETING INTERESTS

770 Z.B. reports research support from Bristol-Meyers Squibb (BMS) unrelated to the current  
771 study. D.L. reports funding by a postdoctoral fellowship from the Society for Immunotherapy of  
772 Cancers, which is funded in part by an educational grant from BMS. BMS has had no input into  
773 the conception, conduct or reporting of the submitted work. L.F. reports receiving commercial  
774 research grants from AbbVie, Bavarian Nordic, BMS, Dendreon, Janssen, Merck, and  
775 Roche/Genentech. A. Rotem is a scientific advisory board (SAB) member of NucleAI and equity  
776 holder in Celsius Therapeutics. A. Regev is a SAB member of Thermo Fisher Scientific and  
777 Syros Pharmaceuticals and is a cofounder of and equity holder in Celsius Therapeutics. M.-E.T.  
778 has been a paid consultant/advisor to Tokai, Janssen, Medivation, Incyte, and Clovis; and has  
779 received advisory board honoraria and trial institutional support from Tokai Pharmaceuticals.  
780 E.M.V.A. reports advisory relationships and consulting with Tango Therapeutics, Genome  
781 Medical, Invitae, Illumina, Ervaxx, and Janssen; research support from Novartis and BMS;  
782 equity in Tango Therapeutics, Genome Medical, Syapse, and Ervaxx; and travel reimbursement  
783 from Roche and Genentech, outside the submitted work.

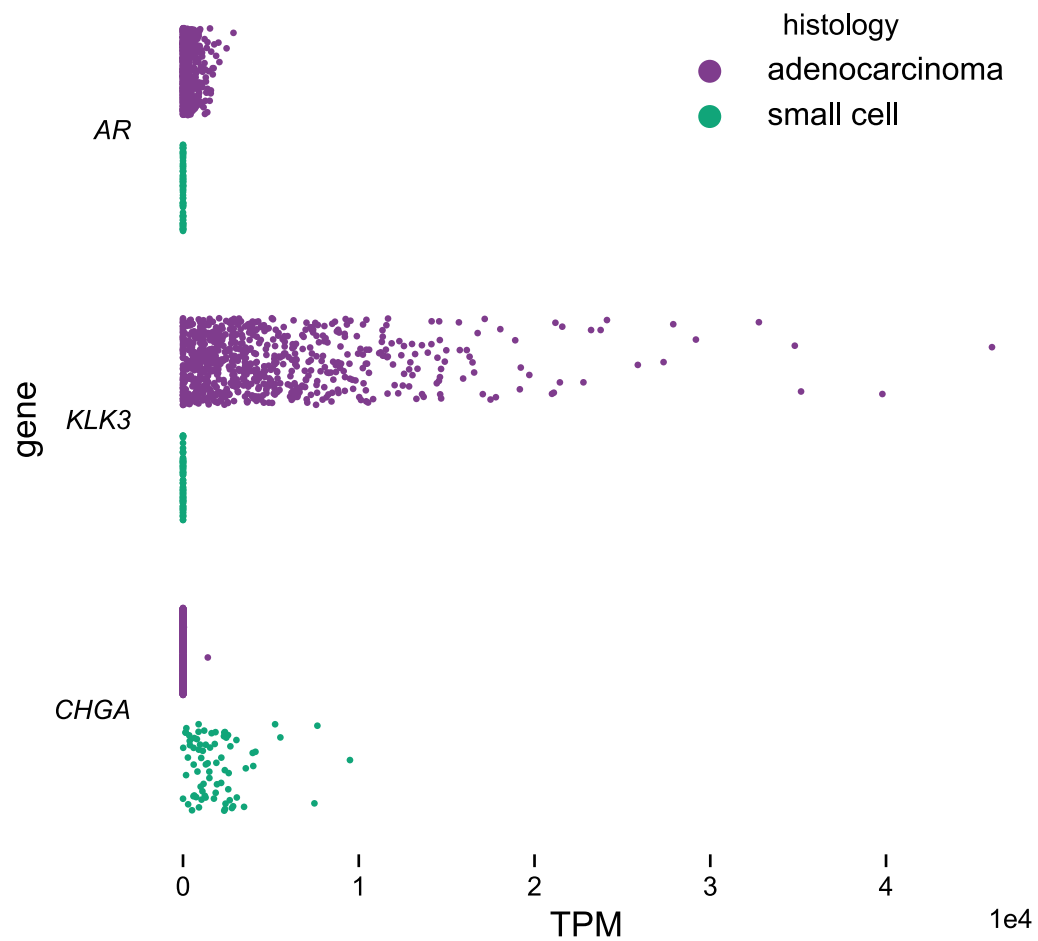

784

785 **Extended Data Figure 1.** Adenocarcinoma and small cell carcinoma cells are clearly

786 distinguished by marker genes.

787 *AR* and *KLK3* (which encodes PSA) expression marks adenocarcinoma cells (n = 760), while

788 *CHGA* marks small cell carcinoma cells (n = 76).

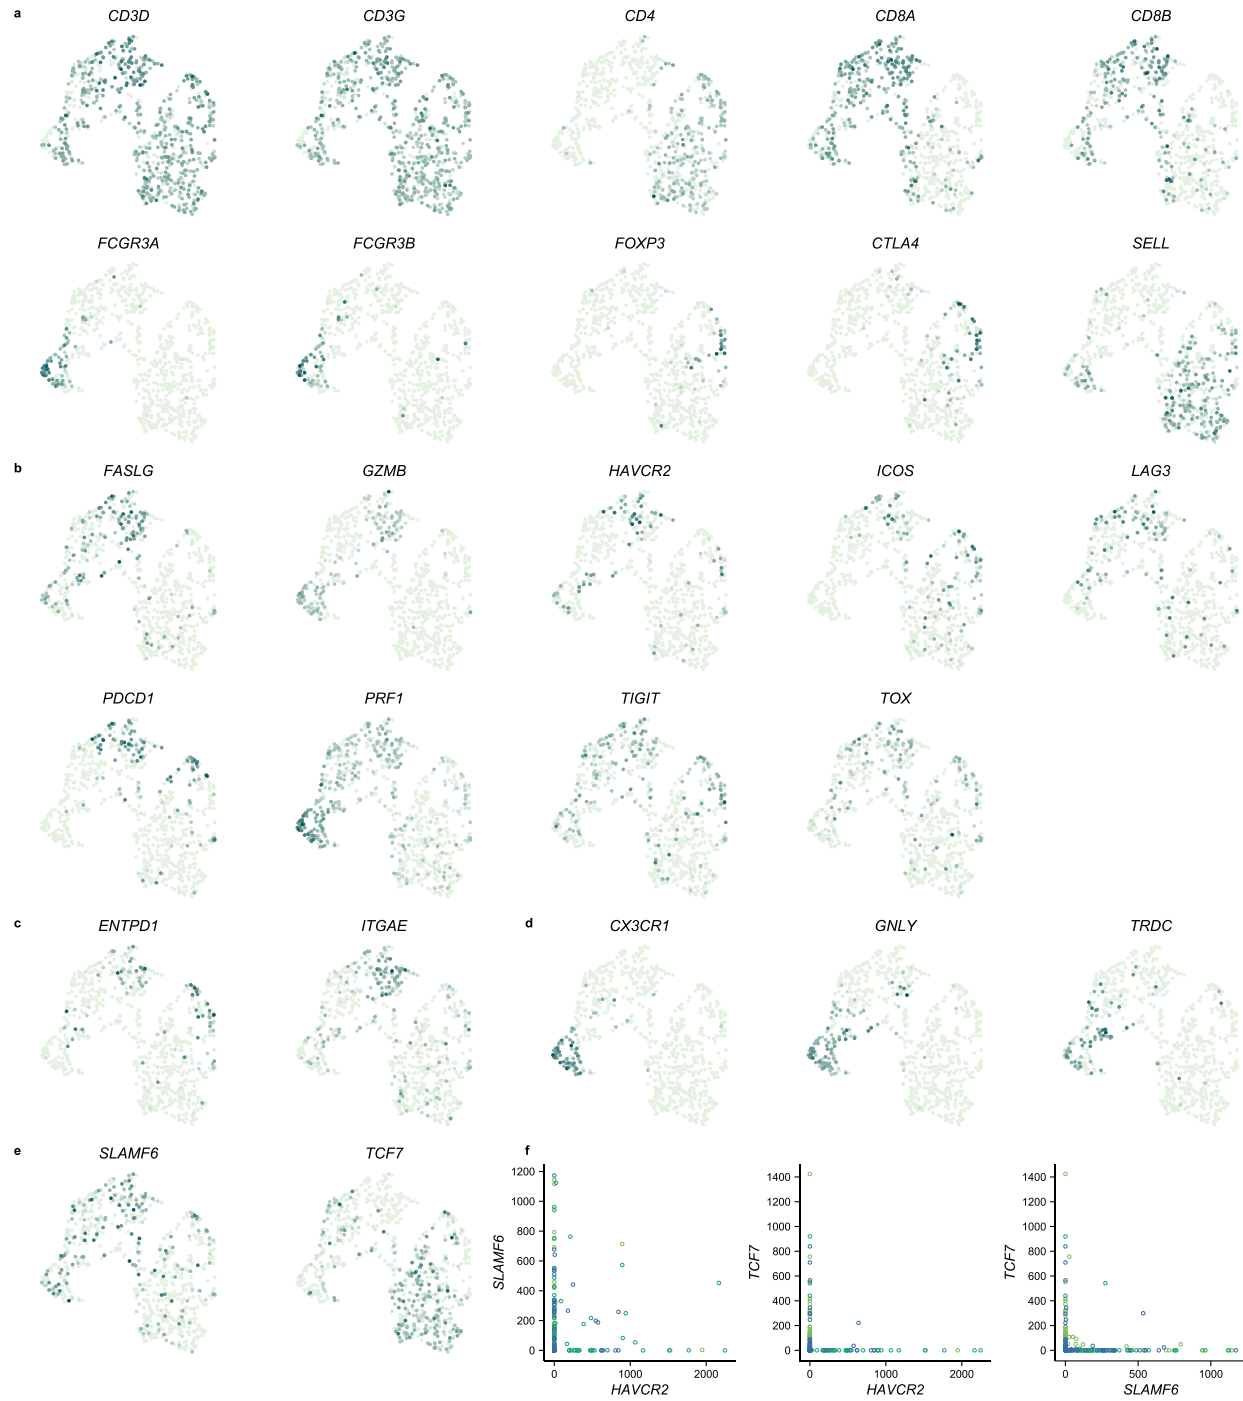

789

790 **Extended Data Figure 2.** Marker gene expression in NK and T cells.

791 Darker colours indicate higher expression of **a)** cell type markers, **b)** dysfunction and activation

792 markers, **c)** markers of tumour-reactive cytotoxic cells, **d)** genes expressed in a *GNLY*-positive

793 cytotoxic subset, and **e)** genes reported to mark a progenitor population necessary for response  
794 after anti-PD-1 therapy in melanoma<sup>44</sup>. Cells are projected onto UMAP space as in Fig. 5a.  
795 **f)** Scatterplots showing pairwise co-expression of *HAVCR2*, *SLAMF6*, and *TCF7* in CD8<sup>+</sup> T  
796 cells. Expression values are in TPM. Points are coloured according to cluster membership as in  
797 Fig. 5a.

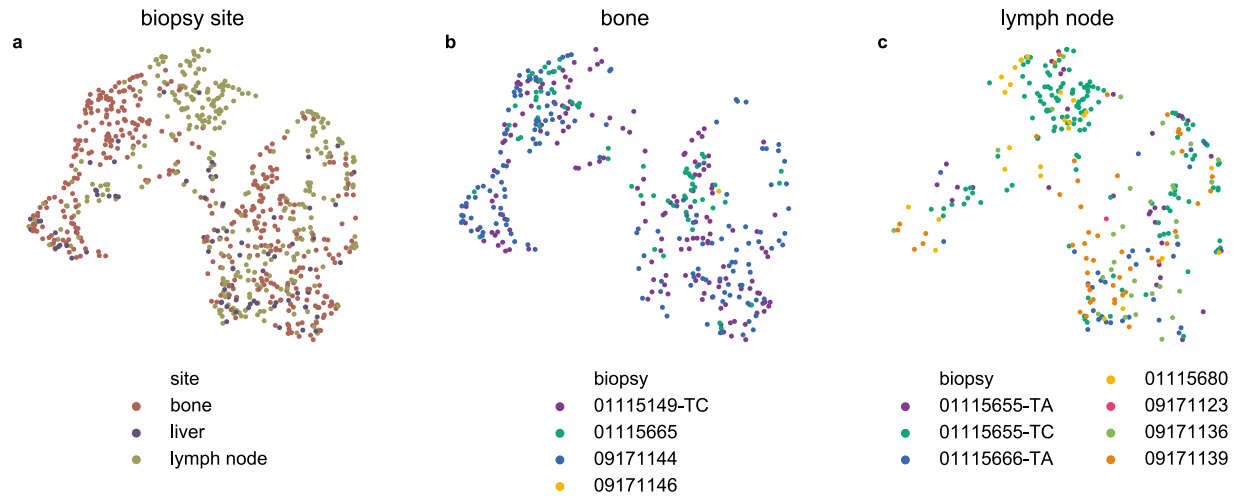

798

799 **Extended Data Figure 3.** Different cytotoxic subsets are represented in different proportions

800 across metastatic sites.

801 NK and T cells are projected onto UMAP space as in Fig. 5a.

802 **a)** Cells are labelled by site of biopsy.

803 Cells infiltrating **b)** bone and **c)** lymph node metastases are labelled by originating biopsy.
